# Supplementary material for: Injectable thermogel constructed from self-assembled polyurethane micelle networks for 3D cell culture and wound treatment
Source: Royal Society of Chemistry journal article supplement (doi:10.1039/d4tb00771a), 2024-01-01
Supplement: d4tb00771a3.pdf [file d4tb00771a3.pdf]

*Updated: 18 June 2024*

## **Supporting Information**

### **Injectable Thermogel Constructed From Self-Assembled Polyurethane Micelle Networks For 3D Cell Culture and Wound Treatment**

**YanJun Wang<sup>1</sup>, Nan Sheng<sup>1</sup>, Ao Wang<sup>1</sup>, Min Wang<sup>1</sup>, Yuanyang Xu<sup>1</sup>, Dan Lu<sup>3</sup>, Wenkai Liu<sup>1</sup>, Zhen Li<sup>1</sup>, Jiehua Li<sup>1</sup>, Jianhui Sun<sup>2\*</sup>, Feng Luo<sup>\*1</sup>**

1 College of Polymer Science and Engineering, State Key Laboratory of Polymer Materials Engineering, Med-X Center for Materials, Sichuan University, Chengdu 610065, China

2 Department of Trauma Medical Center, Daping Hospital, State Key Laboratory of Trauma, Burns and Combined Injury, Army Medical University, Chongqing, 400042, China

3 Department of Otorhinolaryngology, Head & Neck Surgery, West China Hospital, Sichuan University, Sichuan, Chengdu 610065, China

\* E-mail: fengluo@scu.edu.cn

\* E-mail: sendy@tmmu.edu.cn

Characterization of Ly-PEG segments (LP) .

The structures and compositions of LP analyzed by <sup>1</sup>HNMR and their <sup>1</sup>HNMR results are presented in Figure S2. The sharp peak at 3.66 ppm is attributed to the methine protons on the PEG block (-CH<sub>2</sub>CH<sub>2</sub>O-). The chemical shifts of Lysine tertiary carbon (-CH-COO) and PEG methoxy proton (-OCH<sub>3</sub>) are 3.27 ppm and 3.15 ppm, respectively, indicating that the multifunctional chain extender has been successfully synthesized. <sup>[1-2]</sup>

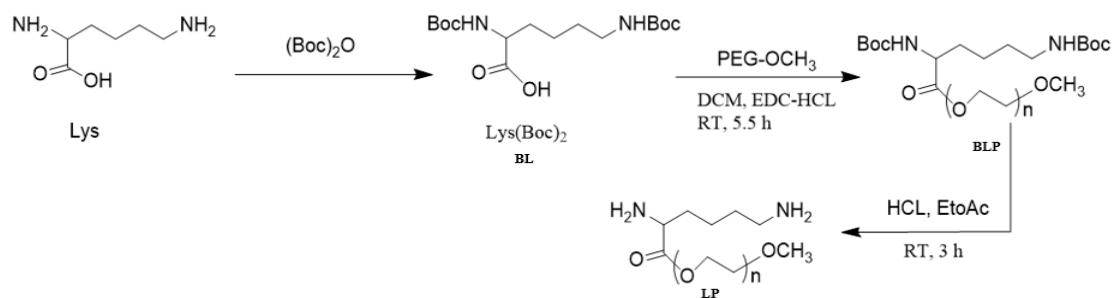

Fig. S 1 Synthesis of LP.

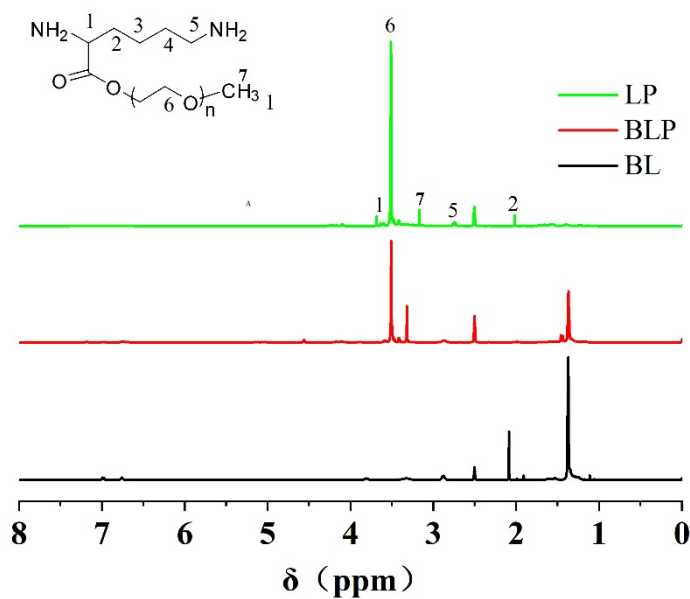

Fig. S 2 <sup>1</sup>H NMR spectrum of LP.

### Synthesis of PUxPy.

PUxPy containing polyurethane emulsion was synthesized by a two-step process: PEG and PCL were added to a three-neck flask. Under nitrogen protection, dehydrate for 2 h at 90 °C under reduced pressure. The reaction was catalyzed by adding LDI and reacted for 2 h at 80 °C. To reduce viscosity, the LP was dissolved with a small amount of DMAc at 40 °C. Then, it was added to the three-neck flask, and the chain was extended at 40 °C for 1.5 h. After

dilution with a small amount of acetone, the pre-polymer was pour into lysine solution emulsified with high-speed stirring, and add NaOH to maintain pH 8-9, and then stir at low speed for 30 min to defoam. Finally, the solid content of the water emulsion is about 20-30%. The infrared spectra of various WPU were shown in Figure S4.

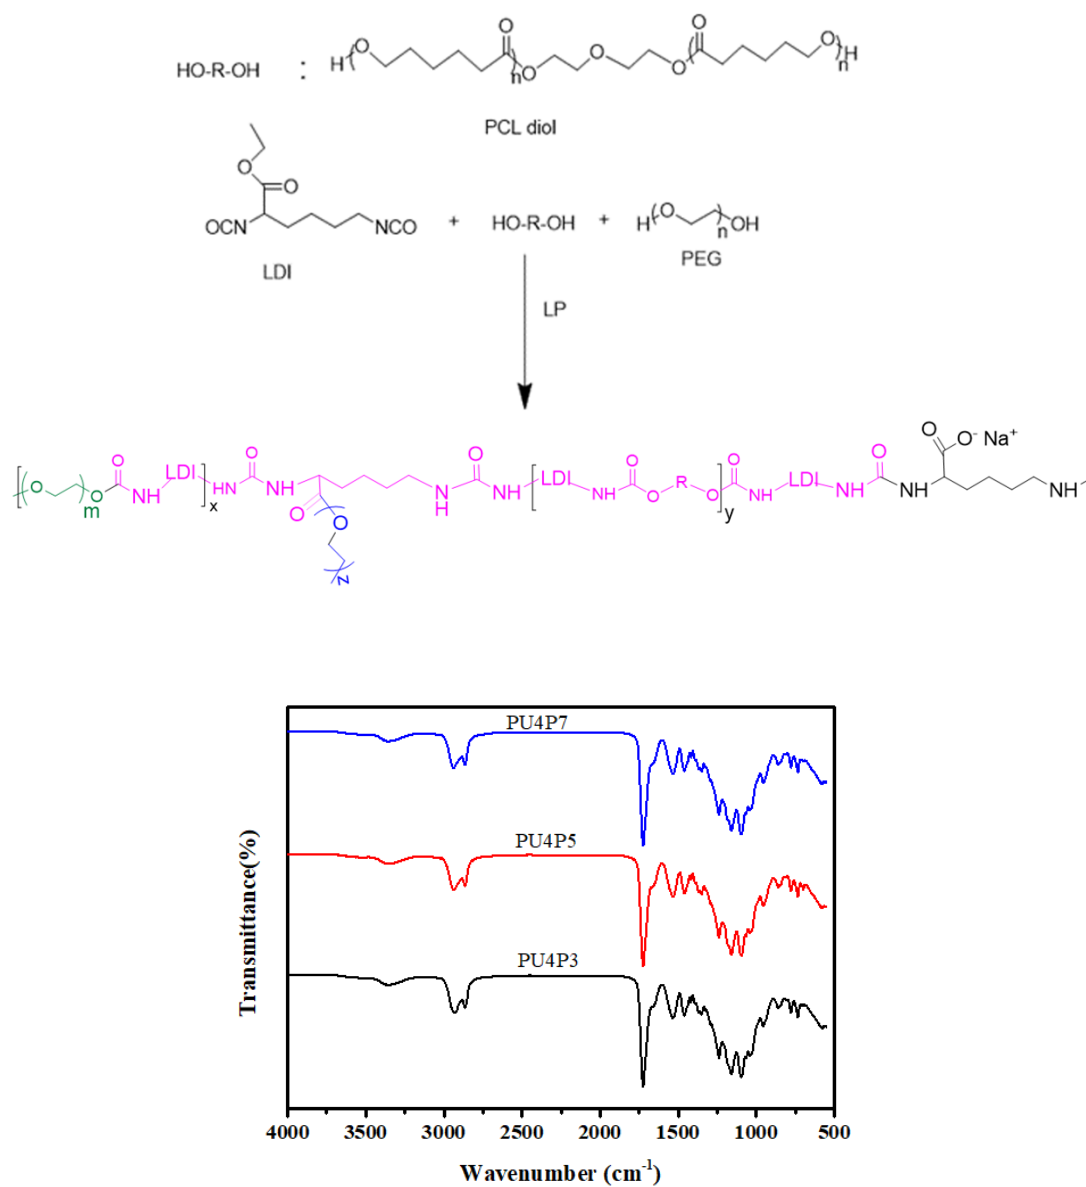

Fig. S 3 Synthesis procedure of WPU.

Fig. S 4 The infrared spectra analysis of various WPUs.

Table S1 The assignment of the FTIR investigations of WPU.

| Wavenumber( $\text{cm}^{-1}$ ) | Assignment                                                  |
|--------------------------------|-------------------------------------------------------------|
| 3315                           | H-bond $\nu(\text{NH})$                                     |
| 2930                           | $\nu_{\text{a}}(\text{CH}_2)$                               |
| 2864                           | $\nu_{\text{s}}(\text{CH}_2)$                               |
| 1723                           | Free $\nu(\text{C}=\text{O})$ urethane amide I              |
| 1533                           | H-bond $\nu(\text{C}-\text{N}) + \delta(\text{N}-\text{H})$ |
| 1460                           | free $\nu(\text{C}-\text{N}) + \delta(\text{N}-\text{H})$   |
| 1238                           | $\nu(\text{C}-\text{N}) + \delta(\text{N}-\text{H})$        |
| 1094                           | free $\nu(\text{C}-\text{O}-\text{C})$                      |

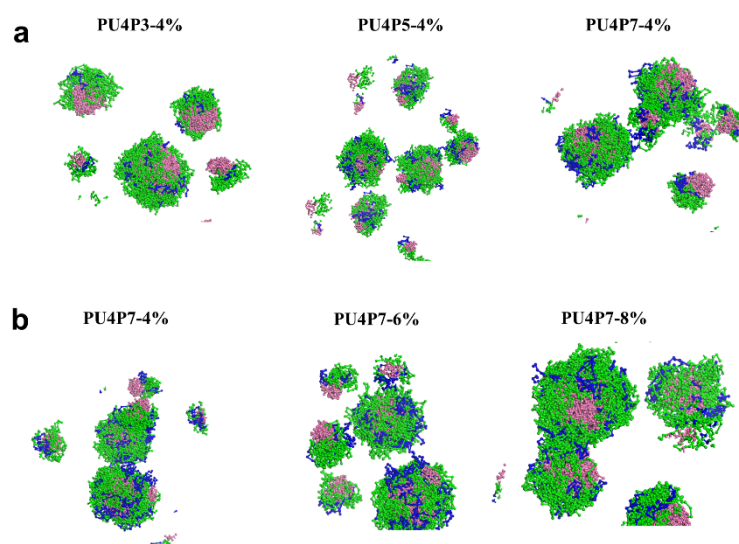

Fig. S 5 DPD simulations of the self-assembly of WPU emulsion. (a)self-assembly behavior of WPU with varying PEG side chain length, (b) self-assembly behavior of WPU with varying polymer concentration.

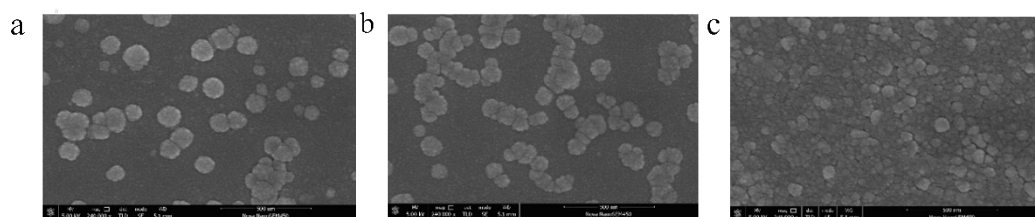

Fig. S 6 The SEM photographs of PU4P7 emulsion particles. (a) concentration of 0.01 wt% at 25 °C, (b) concentration of 0.01 wt% at 37 °C, (C) concentration of 1.0 wt% at 37 °C.

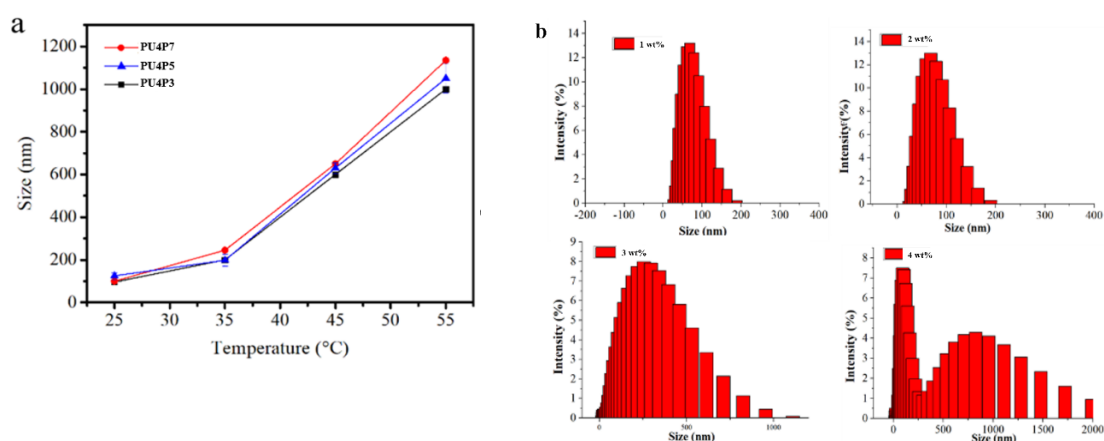

Fig. S 7 The size statistics of PU4Py ( $y=3,5,7$ ) emulsion particles. (a) Average size vs temperature for the DLS test, (b) size distribution of PU4P7 emulsion at different concentrations at 37 °C.

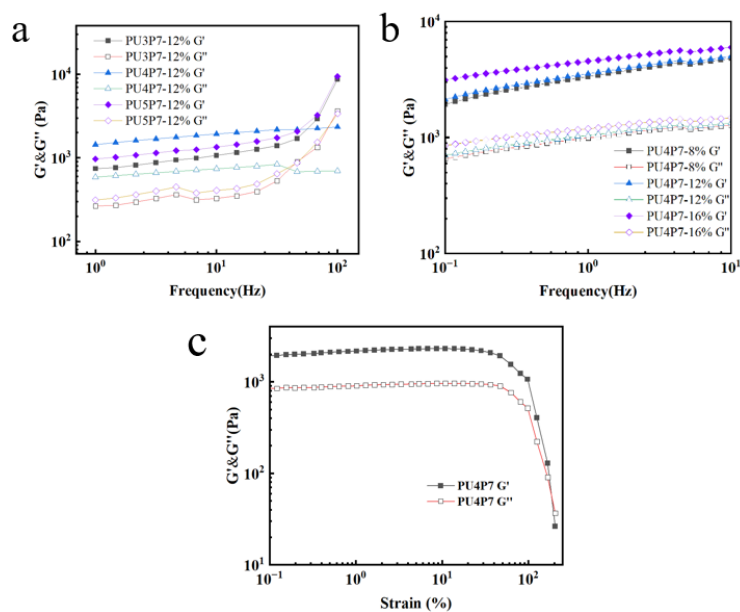

Fig. S 8 (a) PUxP7 (x=3,4,5) Hydrogel scanning was conducted within the frequency range, (b) hydrogel scanning was performed under different solid contents ranging from 8% to 16%, (c) PU4P7 hydrogel scanning was performed under strain levels ranging from 0.1% to 200% .

Table S 2 Composition and Molecular Weights Polyurethanes with Various Amounts of LP.

| Sample | Size (nm) | PDI   |
|--------|-----------|-------|
| PU4P3  | 106       | 0.267 |
| PU4P5  | 120       | 0.236 |
| PU4P7  | 136       | 0.235 |

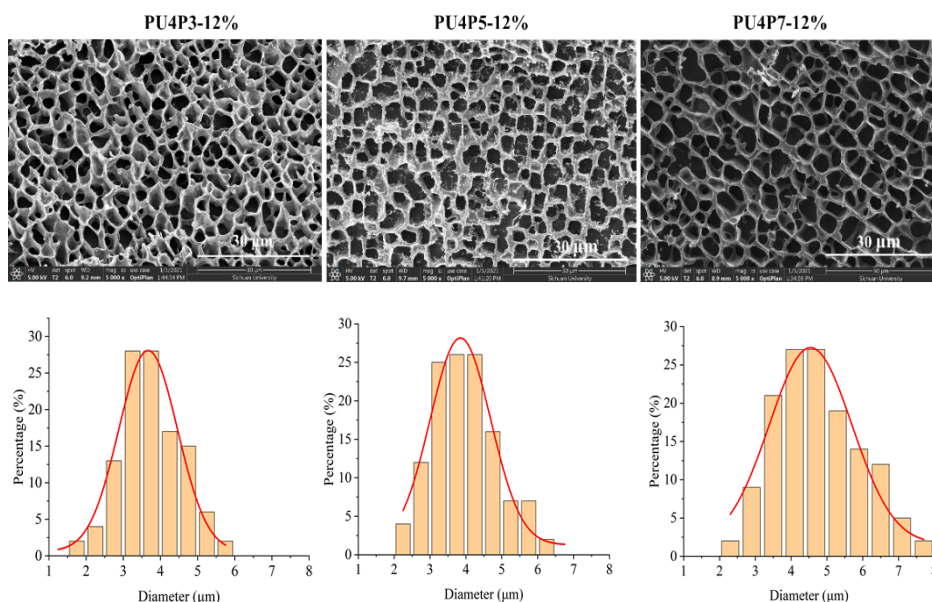

Fig. S 9 Pore size distribution of PU4Py-12% hydrogels.

Table S3 molar ratio of different polyurethane emulsions.

| PUxPy | PEG/ % | LP / g·mol <sup>-1</sup> |
|-------|--------|--------------------------|
| PU3P3 | 30     | 350                      |
| PU3P5 | 30     | 550                      |
| PU3P7 | 30     | 750                      |
| PU4P3 | 40     | 350                      |

|       |    |     |
|-------|----|-----|
| PU4P5 | 40 | 550 |
| PU4P7 | 40 | 750 |
| PU5P3 | 50 | 350 |
| PU5P5 | 50 | 550 |
| PU5P7 | 50 | 750 |

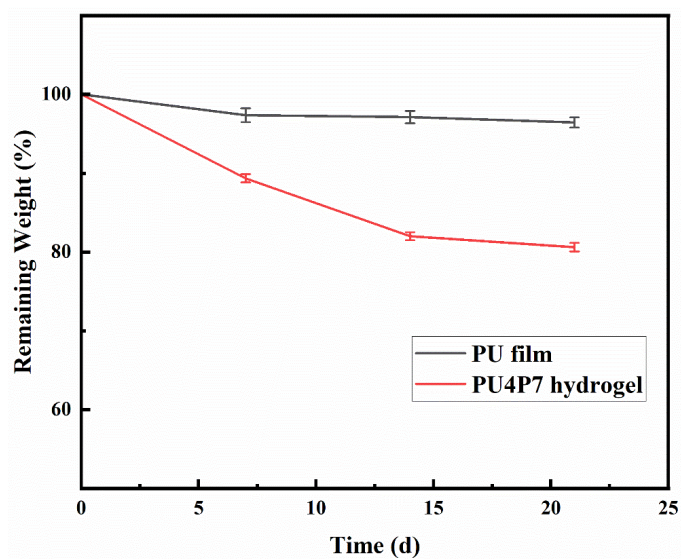

Fig. S 10 Degradation curves of PU film and PU4P7 hydrogels in PBS buffer.

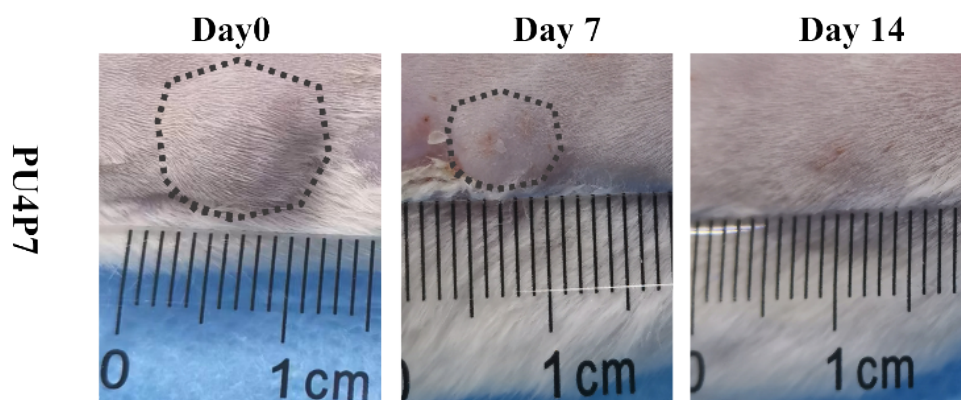

Fig. S 11 Subcutaneous degradation of PU4P7 hydrogels in rats.

## REFERENCE

- [1] K. Wu, X. Chen, S. Gu, S. Cui, X. Yang, L. Yu, J. Ding, *Macromolecules* 2021, 54, 7421.
- [2] S. M. Hashemnejad, A. Z. M. Badruddoza, B. Zarket, C. R. Castaneda, P. S. Doyle, *Nature Communications* 2019, 10,2749.
